# Supplementary material for: Full pH-range responsive hyperbranched polyethers: synthesis and responsiveness
Source: Royal Society of Chemistry journal article supplement (doi:10.1039/c4py00284a), 2014-01-01
Supplement: c4py00284a1.pdf [file c4py00284a1.pdf]

Supporting Information for

## Full pH-range responsive hyperbranched polyethers: synthesis and responsiveness

Yumin Xia\*, Xinhang Wang, Yanping Wang, Yimin Wang.

State Key Laboratory for Modification of Chemical Fibers and Polymer Materials,  
College of Materials Science and Engineering, Donghua University, 2999 North  
Renmin Road, Shanghai, 201620, People's Republic of China. E-mail:  
xym@dhu.edu.cn

\*Corresponding author.

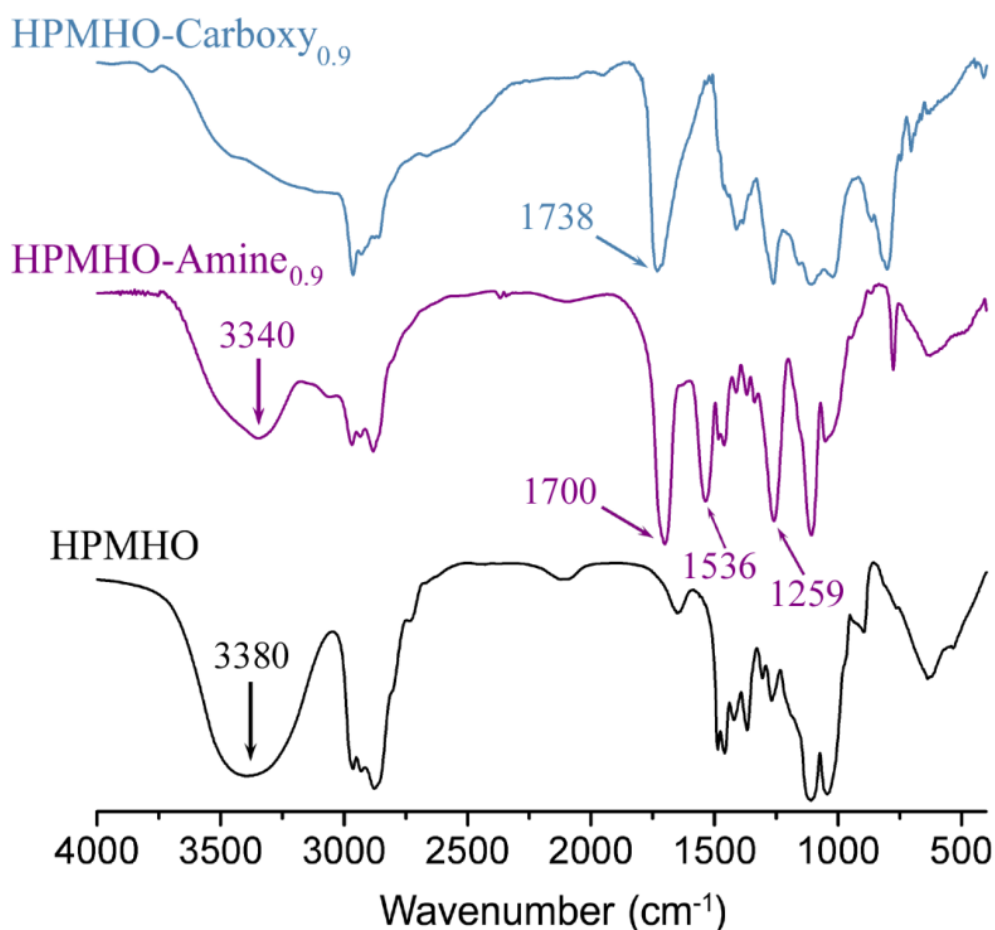

**Figure S1.** FTIR spectra of HPMHO, HPMHO-Amine and HPMHO-Carboxy.

IR (cm<sup>-1</sup>): 3380 (ν<sub>as</sub> OH), 3340 (ν<sub>s</sub> NH), 2965 (ν<sub>as</sub> CH<sub>3</sub>), 2930 (ν<sub>as</sub> CH<sub>2</sub>), 2881 (ν<sub>s</sub> CH<sub>3</sub>), 2858 (ν<sub>s</sub> CH<sub>2</sub>), 1738 (ν<sub>C=O</sub>), 1700 (ν<sub>N-C=O</sub>), 1536 (δ<sub>NH</sub>), 1259 (ν<sub>s</sub> C-N), 1255 (ν<sub>as</sub> C-O-C), 1044 (ν<sub>s</sub> C-O-C).

Figure S1 presents the FTIR spectra of HPMHO, HPMHO-Amines and HPMHO-Carboxys . The bands at 2956 and 2881  $\text{cm}^{-1}$  are assigned to asymmetric and symmetric  $-\text{CH}_3$  stretching vibrations, respectively. The peaks at 2930 and 2881  $\text{cm}^{-1}$  correspond to asymmetric and symmetric  $-\text{CH}_2-$  stretching vibration, and the asymmetric and symmetric stretching vibration of C-O-C cause absorption at 1255 and 1044  $\text{cm}^{-1}$ . In HPMHO's spectrum, the band at 3380  $\text{cm}^{-1}$  is ascribed to asymmetric stretching vibration of hydroxyl. After amination, the absorption of N-H stretching appears at 3340  $\text{cm}^{-1}$ . The characteristic absorbance of C=O in urethane appears at 1700  $\text{cm}^{-1}$ , while the peaks at 1536 and 1259  $\text{cm}^{-1}$  are assigned to shear vibration of N-H and stretching vibration of C-N, respectively. For HPMHO-Carboxys, the absorption of C=O in the ester groups appears at 1738, different from the amination, and also the hydroxy peaks at 3380  $\text{cm}^{-1}$  decreases greatly. All of these results are consistent with the NMR analysis and indicate the success of both amination and carboxylation.
